# Supplementary material for: Select Antitumor Cytotoxic CD8+ T Clonotypes Expand in Patients with Chronic Lymphocytic Leukemia Treated with Ibrutinib
Source: Oxford University Press journal article supplement (doi:10.1158/1078-0432.ccr-20-4894), 2021-04-19
Supplement: 10780432ccr204894-sup-257520_3_supp_7057323_qrk6kn.docx [file 10780432ccr204894-sup-257520_3_supp_7057323_qrk6kn.docx]

**Supplementary Table S1.** Flow cytometry antibody panel.

| **Fluorochrome** | **Marker** | **Clone** | **Brand** |
| --- | --- | --- | --- |
| FITC | TCR Vß | various | Beckman Coulter |
| PE | TCR Vß | various | Beckman Coulter |
| Alexa Fluor 700 | Granzyme B | GB11 | BD Pharmingen |
| APC-H7 | CD3 | SK7 | BD Pharmingen |
| V500 | CD14 | M5E2 | BD Horizon |
| V500 | CD19 | HIB19 | BD Horizon |
| BV650 | CD8 | RPA-T8 | BD Horizon |
| BV786 | CD4 | SK3 | BD Horizon |
| BV421 | PD1 | EH12.1 | BD Horizon |

**Supplementary Table S2.** Baseline clinicobiological features of patients with CLL.

| **Characteristics** | | **Total**  **n=26** | **Sustained response**  **n=14** | **PD**  **n=12** |
| --- | --- | --- | --- | --- |
| Male, N (%) | | 15 (57.7) | 9 (64.3) | 6 (50.0) |
| Age, median (range) | | 65 (56 - 82) | 65 (56 - 82) | 67 (59 - 79) |
| Rai stage 3-4, N (%) | | 17 (65.4) | 9 (64.3) | 8 (66.7) |
| B2M mg/L, median (range) | | 4.3  (1.7 - 9.0) | 3.55  (1.70 - 8.60) | 5.15  (3.20 - 9.00) |
| IGHV unmutated, N (%) | | 17 (65.4) | 9 (64.3) | 8 (66.7) |
| WBC x109/L, median (range) | | 81.55  (3.75 - 406.82) | 83.81  (3.75 - 214.73) | 66.93  (3.76 - 406.82) |
| Lymphocyte count x109/L, median (range) | | 75.97  (2.79 - 401.94) | 78.77  (2.78 - 208.29) | 65.13  (3.17 - 401.94) |
| CD19+ count x109/L, median (range) | | 71.42  (0.74 - 393.50) | 74.48  (0.74 - 202.87) | 61.66  (1.06 - 393.50) |
| CD3+ count x109/L, median (range) | | 2.97  (0.65 - 18.75) | 2.63  (1.66 - 7.37) | 3.38  (0.65 - 18.75) |
| CD4+ T-cells count x109/L, median (range) | | 1.70  (0.44 - 6.97) | 1.71  (0.87 - 3.48) | 1.70  (0.44 - 6.97) |
| CD8+ T-cells count x109/L, median (range) | | 1.14  (0.19 - 11.36) | 1.04  (0.57 - 3.48) | 1.50  (0.19 - 11.36) |
| CD4+/CD8+, median (range) | | 1.36  (0.32 - 4) | 1.41  (0.78 - 3.00) | 1.24  (0.32 - 4.00) |
| FISH categories | del(17p), N (%) | 19 (73.1) | 9 (64.3) | 10 (83.3) |
| trisomy 12, N (%) | 3 (11.5) | 1 (7.1) | 2 (16.7) |
| del(11q), N (%) | 2 (7.7) | 2 (14.3) | 0 (0) |
| del(13q), N (%) | 2 (7.7) | 2 (14.3) | 0 (0) |
| Treatment naïve, N (%) | | 15 (57.7) | 12 (85.7) | 3 (25.0) |
