# Supplementary material for: Select Antitumor Cytotoxic CD8+ T Clonotypes Expand in Patients with Chronic Lymphocytic Leukemia Treated with Ibrutinib
Source: Oxford University Press journal article supplement (doi:10.1158/1078-0432.ccr-20-4894), 2021-04-19
Supplement: 10780432ccr204894-sup-257520_3_supp_7057325_qry6l4.docx [file 10780432ccr204894-sup-257520_3_supp_7057325_qry6l4.docx]

**Supplementary Figure S2.** Scatter plot of the TRBV frequency as detected by next generation sequencing (NGS) and flow cytometry. Spearman rho correlation coefficient and two tail p-value are shown.
