# Supplementary material for: Select Antitumor Cytotoxic CD8+ T Clonotypes Expand in Patients with Chronic Lymphocytic Leukemia Treated with Ibrutinib
Source: Oxford University Press journal article supplement (doi:10.1158/1078-0432.ccr-20-4894), 2021-04-19
Supplement: 10780432ccr204894-sup-257520_3_supp_7057326_qrr6m1.docx [file 10780432ccr204894-sup-257520_3_supp_7057326_qrr6m1.docx]

**Supplementary Figure S3.** (A) Frequency of predominant clonotypes as detected by NGS and of the corresponding CD8+ TRBV families as measured by flow cytometry. Grey bars indicate TRBV families that did not have commercially available fluorescent-labelled antibodies. (B) Pie chart of the most expanded clonotypes and expression of granzyme B (GrB). CD8+ GrB+ clonotypes comprising >2% of the repertoire at the time of response are shown in color.
