# Supplementary material for: Select Antitumor Cytotoxic CD8+ T Clonotypes Expand in Patients with Chronic Lymphocytic Leukemia Treated with Ibrutinib
Source: Oxford University Press journal article supplement (doi:10.1158/1078-0432.ccr-20-4894), 2021-04-19
Supplement: 10780432ccr204894-sup-257520_3_supp_7057328_qrh6ns.docx [file 10780432ccr204894-sup-257520_3_supp_7057328_qrh6ns.docx]

**Supplementary Figure S5.** Histogram of PD-1 expression in total CD3+, total CD8+, and the most abundant CD8+ clonotype in each patient after expansion with beads or autologous CLL cells.
